# Supplementary material for: Effect of home-based interventions on basic activities of daily living for patients who had a stroke: a systematic review with meta-analysis
Source: HighWire-hosted journal article supplement (doi:10.1136/bmjopen-2021-056045), 2022-07-01
Supplement: bmjopen-2021-056045supp001_data_supplement.pdf [file bmjopen-2021-056045supp001_data_supplement.pdf]

**Appendix 1.****Search strategy of MEDLINE through PubMed**

| MEDLINE |                                                                            |
|---------|----------------------------------------------------------------------------|
| #1      | stroke [Mesh]                                                              |
| #2      | hemiplegia [Mesh]                                                          |
| #3      | "cerebrovascular disorders" [Mesh]                                         |
| #4      | "cerebral vascular accident"                                               |
| #5      | "cerebrovascular accident"                                                 |
| #6      | "cerebral vascular disease"                                                |
| #7      | "cerebrovascular disease"                                                  |
| #8      | "cerebral vascular disorder"                                               |
| #9      | "cerebrovascular disorder"                                                 |
| #10     | "stroke"                                                                   |
| #11     | "hemiplegia"                                                               |
| #12     | "hemiplegic"                                                               |
| #13     | #1 OR #2 OR #3 OR #4 OR #5 OR #6 OR #7 OR<br>#8 OR #9 OR #10 OR #11 OR #12 |
| #14     | "home care services" [Mesh]                                                |
| #15     | "home care service"                                                        |
| #16     | "home care"                                                                |
| #17     | "home based"                                                               |
| #18     | home                                                                       |

|          |                                                                       |
|----------|-----------------------------------------------------------------------|
| #19      | "residential care service"                                            |
| #20      | "residential care"                                                    |
| #21      | "residence based"                                                     |
| #22      | "residence"                                                           |
| #23      | "resident"                                                            |
| #24      | #14 OR #15 OR #16 OR #17 OR #18 OR #19 OR<br>#20 OR #21 OR #22 OR #23 |
| #25      | activities of daily living [Mesh]                                     |
| #26      | "activities of daily living"                                          |
| #27      | "ADL"                                                                 |
| #28      | "barthel index"                                                       |
| #29      | "BI"                                                                  |
| #30      | "FIM"                                                                 |
| #31      | "functional independence measure"                                     |
| #32      | "daily life activity"                                                 |
| #33      | #25 OR #26 OR #27 OR #28 OR #29 OR #30 OR<br>#31 OR #32               |
| #34      | #13 AND #24 AND #33                                                   |
| Filters: | Article types: randomized controlled trial                            |
|          | Text availability: full text                                          |
|          | Publication date: from 1000.1.1 to 2021.12.31                         |
|          | Language: English                                                     |

|  |                  |
|--|------------------|
|  | Journal: MEDLINE |
|--|------------------|

### Search strategy of Embase through EMBASE.com

| EMBASE |                                                                    |
|--------|--------------------------------------------------------------------|
| #1     | 'cerebrovascular accident' / exp OR 'cerebrovascular accident'     |
| #2     | 'cerebral vascular accident' / exp OR 'cerebral vascular accident' |
| #3     | 'cerebrovascular disease' / exp OR 'cerebrovascular disease'       |
| #4     | 'cerebral vascular disease' / exp OR 'cerebral vascular disease'   |
| #5     | 'cerebral vascular disorder' / exp OR 'cerebral vascular disorder' |
| #6     | 'cerebrovascular disorder' / exp OR 'cerebrovascular disorder'     |
| #7     | 'stroke' / exp OR 'stroke'                                         |
| #8     | 'hemiplegia' / exp OR 'hemiplegia'                                 |
| #9     | 'hemiplegic' / exp OR 'hemiplegic'                                 |
| #10    | #1 OR #2 OR #3 OR #4 OR #5 OR #6 OR #7 OR #8 OR #9                 |
| #11    | 'home care service' / exp OR 'home care service'                   |
| #12    | 'home care' / exp OR 'home care'                                   |
| #13    | 'home based'                                                       |
| #14    | 'home' / exp OR 'home'                                             |
| #15    | 'residential care service'                                         |
| #16    | 'residential care' / exp OR 'residential care'                     |
| #17    | 'residence based'                                                  |
| #18    | 'residence' / exp OR 'residence'                                   |
| #19    | 'resident' / exp OR 'resident'                                     |

|          |                                                                              |
|----------|------------------------------------------------------------------------------|
| #20      | #11 OR #12 OR #13 OR #14 OR #15 OR #16 OR #17 OR #18 OR #19                  |
| #21      | 'activities of daily living' / exp OR 'activities of daily living'           |
| #22      | 'daily life activity' / exp OR 'daily life activity'                         |
| #23      | 'adl'                                                                        |
| #24      | 'barthel index' / exp OR 'barthel index'                                     |
| #25      | 'bi'                                                                         |
| #26      | 'functional independence measure' / exp OR 'Functional independence measure' |
| #27      | 'fim'                                                                        |
| #28      | #21 OR #22 OR #23 #24 OR #25 OR #26 OR #27                                   |
| #29      | #10 AND #20 AND #28                                                          |
|          | Sources: Embase                                                              |
| Filters: | Study type: randomized controlled trial                                      |
|          | Publication type: article                                                    |
|          | Publication year: <1966 to 2021                                              |
|          | Language: English                                                            |

**Search strategy of CINAHL through EBSCOhost**

| CINAHL |                                                             |
|--------|-------------------------------------------------------------|
| S1     | "cerebral vascular accident" (Find all my search terms)     |
| S2     | "cerebrovascular accident" (Find all my search terms)       |
| S3     | "cerebral vascular disease" (Find all my search terms)      |
| S4     | "cerebrovascular disease" (Find all my search terms)        |
| S5     | "cerebral vascular disorder" (Find all my search terms)     |
| S6     | "cerebrovascular disorder" (Find all my search terms)       |
| S7     | "stroke" (Find all my search terms)                         |
| S8     | "hemiplegia" (Find all my search terms)                     |
| S9     | "hemiplegic" (Find all my search terms)                     |
| S10    | S1 OR S2 OR S3 OR S4 OR S5 OR S6 OR S7 OR S8 OR S9          |
| S11    | "home care service" (Find all my search terms)              |
| S12    | "home care" (Find all my search terms)                      |
| S13    | "home based" (Find all my search terms)                     |
| S14    | "home" (Find all my search terms)                           |
| S15    | "residential care service" (Find all my search terms)       |
| S16    | "residential care" (Find all my search terms)               |
| S17    | "residence based" (Find all my search terms)                |
| S18    | "residence" (Find all my search terms)                      |
| S19    | "resident" (Find all my search terms)                       |
| S20    | S11 OR S12 OR S13 OR S14 OR S15 OR S16 OR S17 OR S18 OR S19 |

|          |                                                              |
|----------|--------------------------------------------------------------|
| S21      | "activities of daily living" (Find all my search terms)      |
| S22      | "ADL" (Find all my search terms)                             |
| S23      | "barthel index" (Find all my search terms)                   |
| S24      | "BI" (Find all my search terms)                              |
| S25      | "functional independence measure" (Find all my search terms) |
| S26      | "FIM" (Find all my search terms)                             |
| S27      | "daily life activity" (Find all my search terms)             |
| S28      | S21 OR S22 OR S23 OR S24 OR S25 OR S26 OR S27                |
| S29      | S10 AND S20 AND S28                                          |
| Filters: | Publication type: Randomized controlled trial                |
|          | Linked full text                                             |
|          | Publication date: to 2021.12.31                              |
|          | Language: English                                            |
